# Supplementary material for: Investigations and facile synthesis of a series of novel multi-functional two-photon absorption materials
Source: Royal Society of Chemistry journal article supplement (doi:10.1039/b703853d), 2007-01-01
Supplement: b703853d.pdf [file b703853d.pdf]

## Supporting information

### Investigations and facile synthesis of a series of novel multi-functional two-photon absorption materials

Yu-Peng Tian <sup>\*, a, b</sup>, Lin Li <sup>a</sup>, Ju-Zhou Zhang <sup>a</sup>, Jia-Xiang Yang <sup>a, b</sup>, Hong-ping Zhou <sup>a</sup>, Jie-ying Wu <sup>a</sup>, Ping-ping Sun <sup>a</sup>, Li-min Tao <sup>c</sup>, Ya-hui Guo <sup>c</sup>, Chuan-Kui Wang <sup>c, d</sup>, Hui Xing <sup>e</sup>, Wen-hao Huang <sup>e</sup>, Xu-Tang Tao <sup>b</sup> and Min-Hua Jiang <sup>b</sup>

<sup>a</sup>Department of Chemistry, Anhui University, Hefei 230039, P. R. China

<sup>b</sup>State Key Laboratory of Crystal Materials, Shandong University, Jinan, 250100, P. R. China

<sup>c</sup>Department of Physics, Shandong Normal University, Jinan 250014, P. R. China

<sup>d</sup>Laboratory of Theoretical Chemistry, Royal Institute of Technology, SCFAB, S-10691 Stockholm, Sweden

<sup>e</sup>Department of Precision Machinery and Precision Instrumentation University of Science and Technology of China, Hefei, 230026, P. R. China

Fax: (+86)551-5107342

E-mail: [yptian@ahu.edu.cn](mailto:yptian@ahu.edu.cn)

**Chemicals:** Triphenylamine, 4-vinylpyridine (95%), 2-vinylpyridine (95%), PMMA (polymethylmethacrylate) and palladium (II) acetate (47.5% Pd) were purchased from Acros Organics. Ethoxylated biphenolA diacrylate, SR 349, was used as purchased from Sartomer, USA.

Mercury (II) oxide yellow, iodine, acrylonitrile, methyl acrylate, butyl acrylate triphenyl- phosphine, ethyl acetate, petroleum ether (60~90), N,N-dimethylformamide, dichloromethane and other solvents were purchased from

Shanghai Chemical Reagent CO., LTD. The chemicals used were of analytical grade. The solvents were purified by conventional methods before use.

**Measurements.** Elemental analyses were performed with a Perkin-Elmer 240B instrument; IR spectra were recorded with a Nicolet FT-IR NEXUS 870 instrument (KBr discs) in the 4000-400  $\text{cm}^{-1}$  region.  $^1\text{H}$  NMR spectra were obtained on a Bruker Avance 600 MHz spectrometer in  $\text{DMSO-}d_6$  solution (with TMS as internal standard). Electrospray Ionization Mass Spectrum (ESIMS) were acquired by a model LCQ ion trap mass spectrometer (Finnigan) equipped with a Finnigan MAT electrospray ion source. Mass spectrum was determined with a Micromass GCT-MS (EI source). Electronic spectra were recorded on a UV-265 spectrophotometer. The one-photon fluorescence spectra measurement is performed with use of a Shimadzu RT-5301PC Spectro-fluorophotome. Spectra are recorded between 400 and 700 nm using a photomultiplier tube as detector. The TPEF spectra were measured using a mode-locked Ti: sapphire laser (Coherent Mira900F) as pump source with pulse duration of 200fs, a repetition rate of 76 MHz, and a single-scan streak camera (Hamamastu Model C5680-01) together with a monochromator as the recorder. The set-up for TPEF measurements is shown in Fig. 6. The TPIP experiments were carried out on the same mode-locked Ti: sapphire laser as that used in the two-photon fluorescence measurements (Fig. S1). It provided the 780 nm lasing source which was tightly focused *via* an objective lens ( $\text{NA} = 0.65$ ), and the focal point was focused on the xy-step monitorized stage controlled by computer.

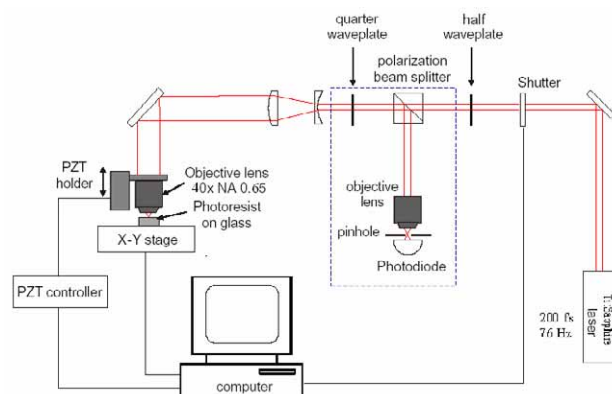

**Fig. S1.** Experimental setup for two-photon photopolymerization and optical data storage.
